# Supplementary material for: Public awareness of online pharmacies, consumers’ motivating factors, experience and satisfaction with online pharmacy services, and current barriers and motivators for non-consumers: The case of Saudi Arabia
Source: PubMed Central journal article supplement — Saudi Pharm J. 2023 Jun 19;31(8):101676. doi: 10.1016/j.jsps.2023.06.009 (PMC10415225; doi:10.1016/j.jsps.2023.06.009), 2023-06-19
Supplement: mmc1.pdf [file mmc1.pdf]

**CONTACT US**Email: [payments@editage.com](mailto:payments@editage.com)

Phone: +1 (833) 979-0061

**RECEIPT****To**

Dr. Omar Almohammed  
King Saud University (جامعة الملك  
سعود )

Saudi Arabia

Phone: +966 555104065

Email:

oalmohammed@ksu.edu.sa

**From**

Cactus Communications Services  
Pte. Ltd.

20 McCallum Street,  
#19-01,

Tokio Marine Centre Singapore -  
069046

Phone: +1 (833) 979-0061

GST Reg. No.: 201526201R

**Receipt detail**

|                       |                                          |
|-----------------------|------------------------------------------|
| Client code           | <b>OEKFI</b>                             |
| Client name           | Dr. Omar Almohammed                      |
| Organisation name     | King Saud University (جامعة الملك سعود ) |
| Payment mode          | Stripe - ENG                             |
| Payment date          | 7 Jun 2023                               |
| <b>Total received</b> | <b>\$193.41</b>                          |
