# Supplementary material for: Public awareness of online pharmacies, consumers’ motivating factors, experience and satisfaction with online pharmacy services, and current barriers and motivators for non-consumers: The case of Saudi Arabia
Source: PubMed Central journal article supplement — Saudi Pharm J. 2023 Jun 19;31(8):101676. doi: 10.1016/j.jsps.2023.06.009 (PMC10415225; doi:10.1016/j.jsps.2023.06.009), 2023-06-19
Supplement: mmc2.pdf [file mmc2.pdf]

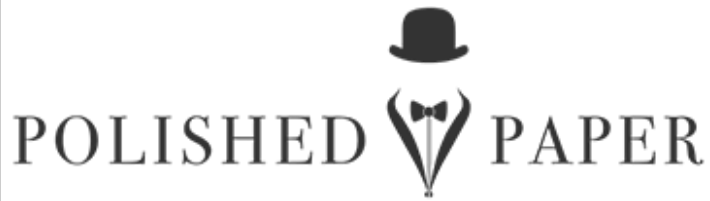

**ORDER SUMMARY**

**Account No:** 23345

**Web Order No:** 39895

**Order Date:** Thu, 2023-04-13 11:12

**Email Address:** oalmohammed@ksu.edu.sa

**Billing Address:**  
Omar Almohammed  
4100 King Saud University  
Unit Number 14  
Riyadh 12372  
Saudi Arabia

| TITLE           | UNIT PRICE | WORD COUNT         | TOTAL             |
|-----------------|------------|--------------------|-------------------|
| 5 days (POL007) | \$0.0390   | 4,700.00           | \$183.3000        |
|                 |            | <b>Order total</b> | <b>\$183.3000</b> |

[Polished Paper](#)  
info@polishedpaper.com
